# Supplementary material
Source: publisher site journal article supplement (https://www.dovepress.com/get_supplementary_file.php?f=274614.docx)
Supplement: Supplementary file 1 [file get_supplementary_file.php]

**Supplementary Table 1:** Variations in clinical data and bone mineral density of the female and male subjects with obesity

|  | Baseline | | 12 Months | |
| --- | --- | --- | --- | --- |
|  | Female. | Male | Female | Male |
| Age (years) | 29.0 (21.0 – 34.8) | 27.0 (23.5 – 35.5) |  |  |
| BMI (kg/m2 ) | 40.0 ± 4.1 | 39.7 ± 6.1 | 26.3 ± 3.5 ### | 27.5 ± 3.2 +++ |
| EBMIL (%) | \ | \ | 88.2 ± 19.5 | 78.5 ± 19.7 |
| OC (ng/ml) | 11.9 ± 4.5 | 16.7 ± 10.7 | 24.3 ± 8.3 ### | 29.6 ± 12.0 +++ |
| TPINP (ng/mL) | 67.60 ± 33.65 | 75.30 ± 36.09 | 82.76 ± 27.85 # | 108.85 ± 43.1 +++ |
| CTX (pg/mL) | 574.5 ± 186.5 | 463.1 ± 208.2 | 719.8 ± 288.0 ## | 896.9 ± 286.1 +++ |
| BMD in Total body (g/cm2) | 1.19 ± 0.14 | 1.25 ± 0.14 | 1.18 ± 0.07 | 1.23 ± 0.14 |
| BMD in Femoral neck (g/cm2) | 0.91 ± 0.10 | 1.01 ± 0.17 * | 0.86 ± 0.10 ## | 0.95 ± 0.16 *+++ |
| BMD in Total hip (g/cm2) | 1.09 ± 0.09 | 1.18 ± 0.13 * | 0.97 ± 0.10 ### | 1.05 ± 0.13 *+++ |
| BMD in Lumbar spine (g/cm2) | 1.08 ± 0.09 | 1.08 ± 0.16 | 1.08 ± 0.11 | 1.06 ± 0.14 |

Data are presented as the mean ± SD and the median (25th–75th percentile). * *P* < 0.05 the female group compared with the male group at each time-point. # *P* < 0.05, ## *P* < 0.01, ### *P* < 0.001 compared with baseline in the female group. +++ *P* < 0.001 compared with baseline in the male group. BMD, bone mineral density; BMI, body mass index; CTX, carboxy terminal telopeptide of collagen type I; EBMIL, excess BMI loss; OC, osteocalcin; TPINP, total-terminal propeptide of type I procollagen.

**Supplementary Table 2:** Variations in clinical data and bone mineral density of the obese subjects with or without T2DM

|  | Baseline | | 12 Months | |
| --- | --- | --- | --- | --- |
|  | With T2DM | Without T2DM | With T2DM | Without T2DM |
| Age (years) | 28.0 (24.3 – 35.8) | 24.0 (20.0 – 30.5) * |  |  |
| BMI (kg/m2) | 39.6 ± 5.7 | 40.1 ± 4.7 | 27.3 ± 3.2 ### | 26.4 ± 3.6 +++ |
| EBMIL (%) |  |  | 79.8 ± 19.5 | 87.4 ± 20.7 |
| FPG (mmol/L) | 6.8 (5.7 – 11.4) | 4.6 (4.2 – 4.8) *** | 4.4 (4.0 – 4.8) ### | 4.3 (4.0 – 4.7) |
| HbA1C (%) | 8.3 (6.6 – 9.7) | 5.5 (5.2 – 5.7) *** | 5.3 (5.1 – 5.5) ### | 5.1 (4.7 – 5.4) *+++ |
| OC (ng/ml) | 12.6 ± 5.5 | 18.8 ± 12.5 | 25.3 ± 8.2 ### | 31.2 ± 14.3 +++ |
| TPINP (ng/mL) | 61.18 ± 24.93 | 92.82 ± 42.01 * | 90.49 ± 27.34 ### | 112.70 ± 53.52 + |
| CTX (pg/mL) | 475.4 ± 200.9 | 629.9 ± 216.6 * | 745.8 ± 255.0 ### | 973.1 ± 321.1 *+++ |
| BMD in Total body (g/cm2) | 1.21 ± 0.12 | 1.25 ± 0.17 | 1.21 ± 0.12 | 1.22 ± 0.12 |
| BMD in Femoral neck (g/cm2) | 0.95 ± 0.14 | 1.00 ± 0.16 | 0.89 ± 0.13 ### | 0.94 ± 0.16 ++ |
| BMD in Total hip (g/cm2) | 1.14 ± 0.11 | 1.14 ± 0.14 | 1.01 ± 0.10 ### | 1.02 ± 0.16 +++ |
| BMD in Lumbar spine (g/cm2) | 1.09 ± 0.12 | 1.06 ± 0.15 | 1.06 ± 0.12 | 1.08 ± 0.14 |

Data are presented as the mean ± SD and the median (25th–75th percentile). * *P* < 0.05, *** *P* < 0.001 the obesity with T2DM group compared with the obesity without T2DM group at each time-point. ### *P* < 0.001 compared with baseline in the obesity with T2DM group. + *P* < 0.05, ++ *P* < 0.01, +++ *P* < 0.001 compared with baseline in the obesity without T2DM group. BMD, bone mineral density; BMI, body mass index; CTX, carboxy terminal telopeptide of collagen type I; EBMIL, excess BMI loss; FPG, fasting plasma glucose; HbA1c,haemoglobin A1c; OC, osteocalcin; TPINP, total-terminal propeptide of type I procollagen.
